# Supplementary material
Source: PubMed Central journal article supplement (PMC4136263)
Supplement: JVI.00556-14_zjv999099335so1.pdf [file JVI.00556-14_zjv999099335so1.pdf]

**Figure S1.** Concatenation of sequences in Fasta format for all the regions in HERV-K (HML-2) proviruses where reads mapped uniquely with Tophat (map quality 255).

```
>HERV-K103_3869_3969
TGAGGCTAAAATAAATCAAGAAAGAGAAGGAATAGGGTATCCTTTTTAGGGGCGGCCACT
GTAGAGCCTCCTAAACCCATACCATTAACCTTGAAAAACAG
>HERV-K103_4056_4156
GTCACATTGAGCCTTCGTTCTCACCTTGAATTCTCCTGTGTTTGTAATTCAGAAGAAAT
CAGGCAAATGGCGTATGTTAACTGACTTAAGGGCTGTAAA
>HERV-K103_4608_4808
AGATAGAAAATAGAAAATTAAGCCACAAAAAATAGAAAATAAGAAAAGACACATTAATAAA
CACTAAATGATTTTCAAAAATTACTAGGAGATATTAATTGGATTTCGGCCAACTCTAGGCA
TTCTTACTTATGCCATGTCAAATTTGTTCTCTATCTTAAGAGGAGACTCAGACTTAAATA
GTAAAAGAATATTAACCCCA
>HERV-K103_6311_6411
CTAATTTGGTGGAAAGATAATAAAAATAAGACATGGGAAATAGGGAAGGTGATAACGTGG
GGGAGAGGTTTTGCTTGTGTTTCACCAGGAGAAAATCAGC
>HERV-K103_6362_6462
ATAACGTGGGGGAGAGGTTTTGCTTGTGTTTCACCAGGAGAAAATCAGCTTCTGTTTGG
TTACCCACTAGACATTTGAAGTTCTACAATGAACCCATCG
>HERV-K111_4894_4994
CCCCACTCCAACCTTTTGATTTTTGCTACTGCACATTCTCCAACAGGCATCATTGTTCAAA
ATACTGATCTTGTGGAGTGGTCATTCCTTCCTCACAGTAC
>HERV-K111_159_259
GTGCTTTGTTCAACAGATGCTTGAAGGCAGCATGCTCGTTAAGAGTCATCACCCTCCCT
AATCTCAAGTACCCGGGGACACAAACTGCGGAAGGCCA
>HERV-K111_7775_7808
GGATGGGAGACAGACTCATGAGCTTAGAACATC
>HERV-K111_7995_8095
GCCAGGAAGTGGCAATTGCAGGAGTTGCTGATGGCCTCGCAAATCTTAACCCTGTAC
TTGGGTAAAGACCATCGGAAGTACTACGATTGTAAATCTC
>HERV-K111_8175_8375
AGAACGGGCCATGATGACGATGGCGGTTTTGTGCGAAAAGAAAAGGGGGAAATGTGGGGAA
AAGCAAGAGAGATCAGATTGTTACTGTGTCTGTGTAGAAAAGTAGACATAGGAGACTC
CATTTTGTCTGTACTAAGAAAATATTCTGCCTTGAGATTCTGTTAATCTATGACCTT
ACCCCAACCCCGTGCTCTC
>HERV-K111_278_378
AAGCCAGGTATTGTCCAAGTTTTCTCTCCATGTGATAGTCTGAAATATGGCCTCGTGGA
AGGGAAAGACCTGACCGTCCCCAGCCCCGACACCCGTAAA
>HERV-K113_4031_4165
TTAGCAAATGAACAGTTAGAAAAGGGTCACATTGAACCTTCGTTCTCACCTTGAATCT
CCTGTGTTTGTAAATTCAGAAGAAATCAGGCAAATGGCGTATGTTAACTGACTTAAGGGCT
GTAAACGCCGTAAT
>HERV-K111_3621_3786
ACTGTCCCAAGTGCCTCAGGGAATGAGCCAGTTACCACAATACAACAATTGTCCCCGCC
ACAAGCGGCAGTGCAGCAGTAGATTTATGTACTATAACAAGCAGTTTCTCTGCTTCCAGGG
GAGCCCCACAAAAAATCCCCACAGGGGTATATGGCCCACTGCCT
>HERV-K113_6376_6482
AGGTTTTGCTTGTGTTTCACCAGGAGAAAATCAGCTTCTGTTTGGATGCCCACTAGACA
TTTGAAGTTCTACAATGAACCCATCGGAGATGCAAAGAAAAGCACC
>HERV-K113_8066_8166
```

GCTCATGAGCTTAGAACATCGTTTCCAGTTACAATGTGACTGGAATACGTCAGATTTTTG  
TATTACACCCCAAATTTATAATGAGTCTGAGCATCACTGG  
>HERV-K11\_423\_660  
TTGCAGTTGAGACAAGAGGAAGGCATCTGTCTCCTGCTTGTCCCTGGGCAATGGAATGTC  
TCGGTGTAAAACCCGATTCATCTACTGAGATAGGGGAAAACCGCCTTAGGGCTGGAGGT  
GGGACATGCGGGCAGCAATACTGCTCTTTAAGGCATTGAGATGTTTATGTGTATACATAT  
CTAAAGCACAGCACTTAATCTTTACCTTGTCTATGATGCAGAGACCTTTGTTACG  
>HERV-K11\_4286\_4386  
AACATTTATTATCGTATTTTGTCTGTAATGGGAGTTTCGAGAAAAAATTAAACTGACAATG  
GACCAGGATATTGTAGTAAAGCTTTCCAAAGATTCTTAAA  
>HERV-K11\_6625\_6858  
AAGAAAAATTATTCTGCCTTGAGATGCTGTTAATCTATAACCTTACCCCAACCCCGTGC  
TCTCTGAAACATGTGCTGTGTCCACTCAGGGTTAAATGGATTAAGGGCGGTGCAAGATGT  
GCTTTGTTCAACAGATGCTTGAAGGCAGCATGCTTGTTAAGAATCATCACCCTCCCTAA  
TCTCAAGTACCCAGGGACACAAACTGCGGAAGGCCGAGGGTCTCTGCCT  
>HERV-K11\_7108\_7431  
GTTCCATCTACTGAGATAGGGGAAAACCGCCTTAGGGCTGGAGGTGGGACATGCGGGCAA  
CAATACTGCTCTGTAAGGCATTGAGATGTTTTATGTGTATGCATATCTAAAGCACAGCAC  
TTAATCTTTACCTTGTCCATGATGCAGAGACCTTTGTTTACGTGTTTATCTGCTGACCT  
TCTCTCCACTATTATCCTATGACCCTGCCACATCCCCCTCTCCGAGAAACACCCAAGAAT  
GATCAATAAATACTAAGGGAACCTCAGAGGCTGGCGGGATCCTCCATATGCTGAACGCTG  
TCCCTGGGCCCCCTTATTTCTT  
>HERV-K12\_4769\_4917  
TGAGATGCTGTTAATCTGTAACCTTTGCCCAACCTTGAGCTCACAGAAACATGTGTTTAT  
GGAATCAAGGTTTAAAGGATCTAGGGCTGTGCAGGATGTGCCTTGTTAACCATATGTTAC  
AGGCAGTATGCTTGGTAAAAGTCATCGC  
>HERV-K12\_5489\_5589  
GGAACCTCAGAGACCGGTGCCAGTGCAGGCTCCTCCGTATGCTGAGCGCCAGTCCCTGGGC  
CCACTTTTCTTTCTTATACTTTGTCTCTGTGTCTTATTT  
>HERV-K12\_619\_854  
TACTCCACTGAGATGTTTGGGTGTGGAGAAGCATAAAATCTGGCCTATGTGCACATCCAGG  
CATAGTACTTTCCCTTGAGCTTATTTGTGACACAGATTCCCTTGCTCACATGTTTTCTTG  
CTGACCTTCTCCCCACTGTCACCCTGTTCTCCTGCCACATTCCTCTTGCTGAGATAGTGA  
AAATAGTAATCAGTAAATACTGAGGGAACCTCAGAGACCCGGTGCCAGTGCAGGTCC  
>HERV-K17A\_3625\_3725  
TGGGCACTGCCTCAGAAAGTGTATCAAAGTGCCAGGATTTTACATTGTCTAGGACCTGATA  
ATCAAGAGAGTACAGTTCAGCCTATGATTACTTCTGTTCC  
>HERV-K17A\_3814\_3914  
TCATGACTAAAATGGGATAGCTCCCTGGCAAAGGACTAGGGAAAAATGGAGAAAGCATTA  
AAGTTCCAATTGAGGCTAAGGGAATCCAGAAAGAAAAGG  
>HERV-K17A\_4211\_4430  
CCCTCTCCAGCCATGATCCCCGAATATTGGCCTTTAATTATAATTGATCTGAAGTATTGC  
TTTTTTACCATTCTCTGGCAAACAGGATTTTAAAAAATTGGCTTTCCTATAACCAGCC  
ATAAATAATAAAGAACCAGCCACTAGATTTTCAGTGGAAAAGTGTTCCTCAGGGAATGCTT  
AATAGTCCAATTTTGTGACACTTTTGTAGCTCAAGTT  
>HERV-K17A\_5298\_5483  
TGGTTCAGCAACGGAATAGTGGCTTACACTGGGCCAAAAGAACAAGTCATTGAAACTCA  
ATATCACTCAGCTCCAAGAGCAGAATTGGTTGCTGTCAATTCAGTGTACAAGATTTTAA  
TCAGCCTATTAACATTGTTTCAGATTCTGCATATTTAGTACAGGCTACAAAGGATGTTGA  
GACAG  
>HERV-K17A\_6035\_6284  
GATACTGTAGCAAAGCATTTCAAAAATCCTTAAATCAGTGGAAAATTACACATACAACAG  
GAATCCTTAATTTCCAAGGACAGGCCATAATTGAAAAGAACTAATAGAACACTCTAAGCTC  
AATTGGTTAAACAAAAAAGGAAAAAGTAAGGAGTATAATACTCCCCAGATGCAACTTAA

TCTAGCACTCTATACTTTAAATTTTTTAAATATATATAGAAATCAGACCACTACTTCTGC  
AGAACAACA  
>HERV-K17A\_728\_856  
TTCCCTTGAACCTTAATTATGATATAGATTCTTTTTGCTCACATGTTTTTGTGACCTCCT  
TATTATCACCTGCTTTCCTAGTATATTCCTTTTTGCTGAAATAATGAAATCATAATCA  
ATAAAAAAC  
>HERV-K17A\_7782\_7882  
ATGGATCGACCGTGGGAGGCTTCTCCATCCGTACATAACTTAAGTATTAAGGAGTTCT  
AATTAGATTTAAAAGATTCATTTTTACTTTGATTGCAGTG  
>HERV-K17A\_8079\_8179  
GCTCATGAGCTTAGAATATCTTTTTCAGTTACAGTGTGACTGGAATACATCAGATTTTTG  
TATTACACCTCGAGCCTATAATGAATCTGAACAGCACTGG  
>HERV-K17A\_8656\_8864  
CTTTGTCCCAGTCACTTTGCCCAACTTGGAGTTCACAAAAACATGTGTTGTATAAAATC  
AAGTTTTGAGGGATCTAGGGCTGTGCAGGACGTGCCCTGTTAACCAAATATTTACAAGCA  
GTATACTTGGTAAAAGTCATTGCCATTCTCTAGTCACAATAAACACGGGAACAATGCAC  
CGTGAAAGCCGCAGGGAGCCCTGCCCT  
>HERV-K17A\_9348\_9517  
AAAATCATAATCAATAAAAACTGAGGGAACCTCAGAGGCCAGTGCCCGTGCAAATCCTGGT  
GTGCTGAGTGCCGGTCCCTGGATCCACTGTTGTTTTCCCTGTACTTTGTCTCTGTGTCTT  
ATTTCTTTTCTCCGTCTCTCATCCACCCGACTAGAAATACCCACAGGT  
>HERV-K17B\_6\_106  
GGGAAAAGAAAGAGAGATCAGACTGTCACTGTGTCTATGTAGAAAGGGAAGACATAAGAG  
ACTCCATTTTGAAAAAGATCTGTACTTTAAACAATTGCTT  
>HERV-K17B\_6109\_6209  
TAAATCAGTGGAAAATTACACATACAACAGGAATCCCTAATTTCCAAGGACAGGCTATAA  
TGAAACAACATAAGAACACTCGAAGCTCAATTGGTTAA  
>HERV-K17B\_6315\_6565  
CTGCAGAACAACATTTTACTGGTAAAAAGAACAGCCACATGAGGGAAAACCTGATTTGGT  
GGAAAGACAACAAAATAAAACATGGGAAATAGGTAAGGTGATAACATGGGGGGGAGGTTT  
TGCTTGTGTTTTACCAGGAGAAAATCAGCTTCCCTGTTTGGCTACCCACTAGACATTTGAA  
GTTCTATAATGAACCCATCAGAGATGCAAGGGAAGGCGCCTCCGCAGAGACAGAGAACCC  
GCAATCGAAC  
>HERV-K17B\_7804\_7977  
AGGCGTGTGGATCCCTTTGTCCATGGATCGACCATGGGACGCTTCTCCATCCGTACATAT  
CTTAAGTATTAAGGAGTTCTAACTAGATCTAAAAGATCCATTTTTACTTTGATTGCAG  
TGATTGTGGGTCTTATTGCAGTCACAGCTACTGCTGCGGCTGCTGGAATTTCT  
>HERV-K17B\_8810\_8977  
TTTACAAGCAGTAAAGTTGGTAAAAGTCATTGCCATTCTCTAGTCACAATAAACAGGGG  
CACAATGCACAGTGGAGAGCCGCAGGGAGCCCTGCCCTTGAAAGCAGGGTTTTGTCCAAG  
GTTTCTCCCCATGTGATAGTCTGAAATATGGCCTCATGGAATGAGAA  
>HERV-K17B\_910\_1010  
CCTGGACCCACTGTTGTTTTCTCTATACTTTGTCTCTGTGTCTTATTTCTTTTCTCCGTCT  
CTCATCCACCCGACTAGAAAATACCCACAGGTGTGGAGGG  
>HERV-K17B\_9206\_9306  
TATTCTTTACTCCACTGAGATGTTTGGGTGGAGAGAAACATAAATGTGCGACTACATGCAA  
GTCCAGTCATATACCTTCCCTTGAACCTAATTATGATATA  
>HERV-K17B\_9429\_9529  
CAGTGCTCGTGAGGTCCCTGGTGTGCTGAGTGCCAGTCCCCTGGACCCACTGTTGTTTCC  
CTGTACTTTGTCTCTGTGTCTTATTTCTTTTCTCTGTCTC  
>HERV-K18B\_160\_261  
AAAACATGTGTTGTATGGAATCAAGGTTTAAGGGATCTAGGGCTGTGCAGGATGTGCCTT  
GTTAACAAAATGTTTACAGGCACTATGCTTGGTAAAAGTCA  
>HERV-K18B\_4632\_4732

AAAATCATGACTAAAATGGGATATCTCCCTGGCAAAGGACTAGGAAAGAATGGAGAAGGC  
ATTAAAGTCCCAATTAAGGCTAAGGAAAATCCAGAAAAGAA  
>HERV-K18B\_470\_660  
CTCTTGCACTTGAGATAGAGGAAGGCCACTGTCTCCTGCCTGCCCTGGGAACCGAATGT  
CTCGGTATAAAACCTGATTGTACATTTGTTCAATTCTGAGATGGGAGAAAAACCACCCTA  
TGGTGGGAGACGAGACATGTTGGCAGCAATGCTGCCTTGTATTCTTTACTCCACTGAGA  
TGTTTGGGCA  
>HERV-K18B\_8383\_8483  
CGGTTTTGTCAAAAAGAAAAGGGGGATATGTAGGGAAAAGAAAGTGAGATCAGACTGTTA  
CTGTATCTATGTAGAAAAGGAAGACGTAAGAGATTCCATT  
>HERV-K18B\_8960\_9119  
TATAAAACCCGATTGTACATTTGTTCAATTCTGAGATGGGAGAAAAACCACCCTATGGCG  
GGAGGCGAGACATGTTGGCAGCAATGCTGCCTTGTATTCTTTACTCCACTGAGATGTTT  
GGCAGAGAGAAAACATAAATCTGGCCTACGTGCACATCC  
>HERV-K20\_7275\_7375  
AAAAGCACAAGAACTTCATGCTTTGACTCATGTAAATGCAGCAGGATTAaaaaacaaatt  
TGATGTCACATGGAAACAGGCAAAAAATATTGTACAACAT  
>HERV-K23\_4\_106  
GGGAAAAGAAAGAGAGATCAGACTGTTACTGTGTCTATGTAGAAAGGGAAGACATAAGAG  
ACTCCATTTTGAAAAAGACCTGTACTTTAAACAATTGCTTTG  
>HERV-K23\_446\_549  
AAAGGGTCTGTGCTGAGGTGGATTAGTAAAAGAGGAAAGCCTCTTGCAGTTGAGATAGAG  
GAAGGCCACTGTCTCCTGCCTGCCCTGGGAACTGAATGTCTC  
>HERV-K23\_5022\_5122  
CCCCTGTCACTTGGGTTAAAACCATTGAAAATTCCACTATTACGAATTTTGTATTAATCC  
TTGTATGTCTGTCTCTCTATTGTTAGTCTACAGGTGTAT  
>HERV-K23\_5640\_5740  
CCCAGCCCAACACCCTGTAAGGGTCTGTGCTGAGGTGGATTAGTAAGAGGAAAGCCTCTT  
GCAGTTGAGATAGAAGGCCACTGTCTCCTGCCTGCCTCTG  
>HERV-K23\_661\_786  
TGAGATGTTTGGGTGGAGAGAAACATAAATCTGGCTTACATGCACGTCCAGTCATAGTAT  
CTTCCCTTGAACCTAATTATGACATAGATTCTATTGCTCACATGTTTGTGCTGACCTTC  
TCCTT  
>HERV-K23\_906\_1006  
GTCCCCTGGGCCACTGTTGTTTCTCTATACTTTGTCTCTGTGTCTTATTTCTTTTCTCA  
GTCTCTCATCCACCTGACTAGAAATACCCACAGGTGTGG  
>HERV-K29\_153\_271  
CTGGAGCTCAGAAAAACATGTGTTGTATGAAATCAAGGTTTAAGGGACCTAGGGCTGTGC  
AGGACGTGCCTTGTTAAACAAAATGTTTACAAGCAGTATACTTGGTAAAAGTCATCGCC  
>HERV-K29\_4820\_4965  
TCCCTTATAATTCCCAAGGACAGGCCATAATTGAAAGAACTAATAGAACACTCAAAGCTC  
AATTGGTTAAACAAAAAAGGGAAAAAGACAGTAAGGAGTATAACACTTCCCAGATGAACT  
TAATCTAGCACCTATACTTTAAAT  
>HERV-K29\_5689\_5789  
GAAAAGCACCGGATGCTTAATGCCTACAAACAAAAATTGGTTGGTAGAAGTACCTACTG  
TCAGTGCTACCAGTAAATTCACTTATCACAGGTAAGTGAA  
>HERV-K29\_5819\_5919  
CAGGATTCTTCCTATAAAAAGATCATTAATAATTTAGGCTTAAGGGAAAATCTTGCCCCAAG  
GAAATTCCAAAAGAATAAAAAGACTCAGAAGTCTTAGTTT  
>HERV-K29\_7479\_7681  
TTGTTAACA AAAATGTTTACAAGCAGTATACTTGGCAAAAAGTCATTGCCATCTCTAGTGTC  
AACAAACCACAGGCATAATGCACTGCAGAAACCCACAGGGAACCTCTGCCCTTGAAAGCTG  
GGTATCGTCCAAGGTTTCTCCCATGTGATAGTCCGAAATATGGCCTCATGAGATGAGAA  
AGACCTGACTGTCCCCAGCCC

>HERV-K29\_7797\_7897  
TAAAACCCGATTGTACATTTGTTCAATTCTGAGATAGGAGAAAAACCGCCCTATGGTGGG  
AGGTGAGACATGTTGGCAGCAATGCTGCCTTGTTATTCTT  
>HERV-K30\_399\_785  
CCCCAGGCTGACAACCATAAAGGCTCTGTGCTGAGGAGGATTAGTGAAAGAGGGAGGCCT  
CTTTGCAGTTGAGATAAGAGGAAGGCATCTGTCTCCTGCTCGTCCCTGGGAATGGAATGT  
CTTGGTGTAAAACCCAACCGTACATTCTATTTACTGAGATAAGAGAAAACCGCCCTGTGG  
CTGGAGGTGAGACATGCTGGCGCAATACTGCTCTTTACTGCACTGAGATGTTTGTGTAA  
AGTCAAACATAAACCTGGCCTACGTGCACATCCAGGCACAGCACCTTTCCTTAAACTTAT  
TTATGACACAGAGTCTTTGCTCATGTTTTCTGCTGACCTTCTCCCCACCATTACCCTA  
TAGTCCTGCCACATCCCCGTCGCCGA  
>HERV-K30\_5969\_6069  
CAAAAACCTGGAGGCTTTACATTTATTAGCAAAGGAACAATTAGAAAAGGGACATATTGAG  
CCTTCATTCTCGCCTTGGAATTCTCCTGTGTTTGTAATTC  
>HERV-K30\_9708\_9808  
CATCCCTGGGAATGGAATGTCTTGGTGTAAAGCCCAATCATAACATTCTGTTTACTGAGAT  
AGGAGAAAACCTGCCCCATGGCTGGAGGTGAGACATGCTGG  
>HERV-K31\_3471\_3571  
CCTATTAACATTGTTTCAGATTCTGCATATGTAGTACAGGCTACAAAGGATGTTGAGACA  
GCCCTAATCAAATATAGTATGGATGATCAGTTAAATCAGC  
>HERV-K31\_3729\_3859  
GCCTTGACTCATGTAAATGCATCAGGACTAAAAAATAAATTTGATATCATATGAAAACAG  
GCAAAAATGTTGTACAACATTGTACTCAGTGTCAAGTCTACATGTGCCCACTCAGGAG  
GCAGGAGTTA  
>HERV-K31\_4672\_4950  
TGCAGGAGCAGCTGCAGCTAATTATACTTACTGGGCCTATGTGCCTTTCCCGCCCTTAAT  
TCAGGCAGTCACTTGGATGGATAATATTCTATTGAAGTATGTGTTAATATTAGTGCATGG  
GTACCAGGACCCACAGATGACCGCGGCCCTGCCCAACCTGAAGAAGAAGGAATGATGATA  
AACATTTCCACTGGGTATCATTATCCTCCTATTTGCCTGGGGAAAGCACCAGGATGCTTA  
ATGCCTACAACCCAAAATTGGTTGGTAGAAGTATCTAC  
>HERV-K31\_5066\_5369  
GGACCTTGCCTCAAGGAAAATTCCCAAAGAATCAAAAAGACCCAGAAGTCTTAGTTTGGGAA  
AAATATGTGGCTGATACTGTGGTGGTATTACAAAACAATAAATTTGGAACCTATTATAGAC  
TGGGCCCTCAAAAACCAATTATATTATGGTTGTATGGGCCAGACTCACTCATGTTACAG  
ACCCCATCTGTCTGGCCCACTAATCCGGCCTATGATAGTGATTTAACTGAAAGGCTAGAC  
CAGGTTTATAGAAGGCTAGAATCACCCATCCATGGAAATGGGGTGAAAAGGGGATTTCA  
TCA  
>HERV-K31\_5627\_5814  
AGATTGTTTACTTGCATTGATTCACTTTTGTATTGGCAGCACCATATTCTGCCAGTGAGG  
GCAAGAGAGGGTGTGTGGATCCCTGTGTCCATGGACCGACCGTGGGAGGCTTCCCCATCC  
ATCCATATTTTAAACAGAAAGTATTTAAAGGAGTTCTAACTAGATCCAAAAGATTCATTTTT  
TACTTTA  
>HERV-K31\_5896\_5996  
CAAAATATATAAATAAATTGGCAAAGAACTCCTCAAAAATTGTGGAATTCTCAGACTCAAA  
TAGACCAAAAATTGGCAAACCAATTAATGATCGTAGACA  
>HERV-K31\_6039\_6221  
CTTTTTCAGTTACAGTGTGACTGGAATATGTCAGATTTTTGTATTACACCTCGAGCCTAT  
AATGAATCTGAACATCACTGGGACATGGTTAGACGCCATCTACAAGGAAGAGAAGATAAC  
CTTACTTTAGATATTTTTAAAATAAATAACAAATTTTTGAGGCATCAAAAAGCCCAGTTC  
AA  
>HERV-K31\_6329\_6673  
ATTAATCCTTGTATGTCTGTTCTCTGTTGCTGGTCTACAGGTGTATCCAGCAGCTCCAGA  
GAGACAGCAACCAGCGAAAACAGGCCATAATGACTATGGCGGTTTTGTCAAAAAGAAAAG  
GGGGATATGTACGGCAAAGAAAGAGAGATCAGACTGTTACTGTGTCTATGTAGAAAAGGGA

AGACATAAGAAATTCCATTTTGACCTGTACCTTGAACAATTGCTTTGCTGAGATGTTGTT  
AATTTGTAACCTTTGCCCCAGCCACTTTGCCCAACTTTGAGCTCACAAAAACATGTGTTG  
TCTGGAATCAAGGTTTAAGGGATCTAGGGCTGTGCAGGATATGC  
>HERV-K36\_714\_814  
TTGTCTGCTGACCCCTCTCCCCACAATTGTCTTGTGACCCTGACACATCCCCCTCTTTGAG  
AACACCCACAGATGATCAATAAATACTAAGGGAACTCAG  
>HERV-K36\_871\_971  
TCTCTATACTTTGTCTCTGTGTCTTTTTCTTTTCCAAATCTCTCGTCCCACCTTATGAGA  
AACACCCACAGGTGTGTAGGGGCAACCCACCCCTACATCT  
>HERV-K36\_9163\_9263  
GTCAGTGTGTCTGTGTAGAAAGAAGTAGACATAGGAGACTCCATTTTGTATGTACTAAG  
AAAAATTCTTCTGCCTTGAGATTCTGTTAATCTATAACCT  
>HERV-K36\_9845\_9945  
GTGTTTGTCTGCTGACCCCTCTCCCCACAATTGTCTTGTGACCCTGACACATCCCCCTCTT  
TGAGAAACACCCACAGATGATCAATAAATACTAAGGGAAC  
>HERV-K37\_1354\_1514  
GGAATGATTGGGCCATTATTAAGCAGCTTTAGAACCATTTCAAACAGAAGAAGATAGCG  
TTTCAGTTTCTGATGCCCTGGAAGCTGTTAATAGATTGTAATGAAAAGACAAGGAAAA  
AAATCCCAGAAAGAAACGGAAGTTTACATTGCGAATATG  
>HERV-K37\_44\_156  
AGAAAGAAGTAGACATAGGAGACTCCATTTTGTCTGTACTAAGAAAAATTCTTCTGCCT  
TGAGATGCTGTTAATCTATGACCTTACCCCCAACCCCATGCTCTCTGAAACA  
>HERV-K37\_8867\_9099  
ATAGAAAGAAGTAGACATAGGAGACTCCATTTTGTCTGTACTAAGAAAAATTCTTCTGC  
CTTGAGATGCTGTTAATCTATGACCTTACCCCCAACCCGTGCTCTCTGAAACATGTGCT  
GTGTCAAACCTCAGGGTTAAATGGATTAAGGGTTGTGCAAGATGTGCTTTGTTAAACAAAT  
GCTTGAAGGCAGCATGCTCTTTAAGAGTCATCACCCTCCCTAATCTCAAGT  
>HERV-K37\_9524\_9715  
CTTTGTTACGTGTTTGTCTGCTGACCCTCTCCCCACTATTGTCTTGTGACCCTGACACA  
TCCCCCTCTCGGAGAAAACCCACGAATGATCAATAAATACTAAGGGAACTCAGAGGCTG  
GCGGGATCCTCCATATGCTGAACGCTGGTTCCCCGGGTCCCCTTATTTCTTTCTCTATAC  
TTTGTCTCTGT  
>HERV-K41\_115\_312  
TAATCTATAACCTTACCCCCAACCCCGTGCTCTCTGAAACATGTGCTGTGTCAACTCAGA  
GTTAAATGGATTAAGGGCGGTGCAAGATGTGCTTTGTTAAACAGATGCTTGAAGGCAGCA  
TGCTCCTTAAGAGTCATCACCCTCCCTAATCTCAAGTACCCAGGGACACAAAAACTGCC  
GAAGGCCACAGGGACCT  
>HERV-K41\_9262\_9362  
ACCCCGTGCTCTCTGAAACATGTGCTGTGTCAACTCAGAGTTAAATGGATTAAGGGCGGT  
GCAAGATGTGCTTTGTTAAACAGATGCTTGAAGGCAGCAT  
>HERV-K42\_1286\_1386  
CCAGAACAGGGAACCTTTAGATTTAAAAGATTGGGAAAAAATTGGCAAAGAATTAAAACAA  
GCAACTAGGGAAGGTAAAAATCATCCCACGTGCAGTATGGA  
>HERV-K42\_1401\_1666  
TTAAAGCAACTTTAGAACCATTTCAAACAGAAGAAGTTAGAGTTTCAGTTTCTGATGCC  
CTGAAAGCTGTGTAATAGATTGTGAAGAGGCAGAAACAGAGTTCAAGAAAGGAACAGAAA  
GTTACATGGTAAAAATGTAGCAGAGCCAGTAATGGCTCGGTCAACGCAAAATGTTGACT  
ACAATCAATTACAGGAGGTAATATATCCTGAAACATTAAAATTTAAAGGAAAAAGTCCAG  
AACCATCAGGGCTGTTGGGGTTAAA  
>HERV-K42\_16\_163  
GGAGATCAGACTGTCACTGTACCTATGTAGAAAGGGAAGACATAAGAGACTCCATTTTGA  
AAAAGACCTGTACTTTAAACAATTGCTTTGCTGAGATGTTGTTAATTTGTAGCTTTCCCC  
AGCCACTTTGACCCAACCTGGAGCTCA  
>HERV-K42\_2342\_2473

CTTTTAATTATAATTGATTCAAAGGATTGCTTTTTTACCATTCTGTGGCAAAACAGGAT  
TTTGAAAAATTTGCTTTTACTATAACCAGCCGTAAATAATAAGAACCAGCCACCAGATTT  
CAGTGGAAAGT  
>HERV-K42\_2784\_2884  
AGGAGAGAGGACACAGGGGATAACAGACAGAGAGACTGGAAAAGACAGAGATCAGAGAAA  
GACACAGAAAGTGAGACTGGCGAGAGAGATCGTGTAAG  
>HERV-K42\_3112\_3329  
CCCACATGAGGGAAAATAATTTGGTGGAAAGACAACAAAAATAAAACATGGGAAATAGG  
GAAGGTGATAACATGGGGGAGAGATTTTGTCTGTGTTAACCAGAAAATAAATCAGCTTC  
CAGTTTGGATACTTACAACCTACAAAAGAAGTTTCCATCTACCAAGAAAGCGGAGCCGTC  
GACATGGGCCAGCTAAAGAAGCTGACACAGTTAGCT  
>HERV-K42\_4242\_4436  
CACAAAGCCATATTACACTATTAACCTAAATTCCAATCTGACAATTCCTTTGCAAAGTTGT  
GTAAAACCCCTTATATGCTAGTTGTAGGAAACATAGTTATTAACCAGATGTCCAAACT  
ATAACCTGTGAAAATTGTAGATTGTTTACTTGCATTGATTCAACTTTTGATTGGCAGCAT  
CGTATTCTGTTAGT  
>HERV-K42\_449\_699  
GTGGATTGGTAAAAGAGGAAAGCCTCTTGCAGTTGAGATAGAGGAAGGCCACTGTCTCCT  
GCCTGCCCCTGGGAAGTGAATGTCTCGGTATAAAAACCCGATTGTACATTTGTTCAATTCT  
GAGATAGTAGCAAAACCGCCCTATGGTGGGAGGCGAGATATGTTTGCAGTAATGCTGCCT  
TGTTATTCTTTACTCCGCTGAGATGTTTGGGTGGAGAGAAACATAAATCTGGATTACGTG  
CACATCCAGG  
>HERV-K42\_4637\_4867  
TGTTCAAACCTACAAAATATGTGAATAATTGGCAAAAGAATTCCTCAAGACTGTGGAATTC  
TCAGACTCAAATAGATCAAAAATTAGCAAATCAAATTAATGATCTTAGACAAACTGTCAAT  
TTGGATGGGAGATAGGCTCATGAGCCTGGAATATCTTTTTCAGTTAGTGTGACTGGACTA  
CGTCAGATTTTTGTATTACACCTCGAGCCTATAATGAATCTGAACATCAC  
>HERV-K42\_5183\_5411  
TTTTGTCAAAAAGAAAAGGGGAAATGTAGGGAAAAGAAAAGAGAGATCAGACTGTCACTG  
TGCCTATGTAGAAAAGGGAAGACATAAGAGACTCCATTTTGAAAAGACCTGTACTTTAAA  
CAATTGCTTTGCTGAGATGTTGTTAATTTGTAGCTTTCCCCAGCCACTTTGACCCAACCT  
GGAGCTCACAAAACATGTGTTGTATAAAATCAATGTTTAAGGGATCT  
>HERV-K42\_5465\_5565  
TAAAAGTCATCGCCATTCTCTAGTCTCAATAAACCAGGGCACAGTGCCTGCAGAAAAGCC  
GCAGAGACCTCTGCCCTTGAAAGCAGGGTATTGTCCAAGG  
>HERV-K42\_5776\_6177  
TCTGAGATAGTAGCAAAACCGCCCTATGGTGGGAGGCGAGATATGTTTGCAGTAATGCTG  
CCTTGTTATTCTTTACTCCGCTGAGATGTTTGGGTGGAGAGAAACATAAATCTGGATTAC  
GTGCACATCTAGGCATAGTACCTTCCCTTAAACCTAATTATGATATAGATTCTTTTGTCTC  
ACATGTTTTTTGCTGACCTTCTCCTTATTATCACCTGCTCTCCTACTACATTCCTTTTT  
GCTGAAATAATGAAAATAATAATAAAACTGAGGGAACTCAGAGGCCGGTGCTGGTGCAG  
GTCCTTGGTATGCTGATGCCGGTCCCCTGGGCCACTGTTGTTTCTCTATACTTTGTCTC  
TGTGTCTTCTTTCTTTCTCAGTCTCTTGTCCCACCCGACT  
>HERV-K4\_6238\_6338  
GCAAGATGTGCTTTGTTAAACAGATGCTTGAAGGCAGCATGCTCCTTAAGAGTCATCACC  
ACTCCCTAATCTCAAGTACCCAGGGACACAAAAACTGCGG  
>HERV-K4\_6504\_6677  
CCTCTTGCAAGTTGAGACAAGAGGAAGGCATCTGTCTCCTGCCTGTCCCTGGGCAATGGAA  
TGTCTCGGTATAAAACCCGATTGTATGCTCCATCTACTGAGATAGGGAAAACCTGCCTTA  
GGGCTGGAGGTGGGACCTGCGGGCAGCAATACTGCTTTGTAAAGCATTGAGAT  
>HERV-K50A\_2986\_3086  
ATTCAGCCATTTGTTCTCAGGGTTTTTCAGGAACAACAACCCCCACTGTCCCAAGTGTTT  
CAGGAATAAGCCAGTTACCACAATACAACAATTGTCCCC  
>HERV-K50A\_3109\_3209

TAGATTTATATACTATACAAGCAGTCTCTCTGCTTCCAGGGGAGCCCCACAAAAAATCC  
CTACAGGGGTATATGGCCCACTGCCTGAGGGGACTGTAGG  
>HERV-K50A\_4185\_4312  
AACCTGGGTTGCCCTCTCCAGCCATGATCCCAAAAGATTGGCCTTTAATTATAATTGATC  
TAAAGGATTGCTTTTTTACCATCCCTCTGGCAGAGCAGGATTGCGAAAAATTTGCCTTA  
CTATAACC  
>HERV-K50A\_430\_578  
GCTGAGGAGGATTAGTATAAGAGGAAGGAATGCCTCTTGCAGTTGAGACAAGAGGAAGGC  
ATCTGTCTCCTGCCTGTCCCTGGGCAATGGAATGTCTCGGTATAAAACCCGATTGTATGC  
TCCATCTACTGAGATAGGGAAAAACCGC  
>HERV-K50A\_4843\_5169  
AATTCAGTCAGCGCAAATAAATAGAATAGATCCCTTAGCCCCACTCCAACTTTTGATTTT  
TGCCACTGCACATTCTCCAACAGGTATCATTATTCAAATACTGATCTTGTGGAGTGGTC  
ATTCCTTCCCTCACAGTACAGTTAAGACTTTTACACTGTACTTGGATCAAATAGCTACATT  
AATTGGTCAGACAAGATTACGAATAATAAAATTATGTGGAAATGACCCAGACAAAATAGT  
TGTCCTTTTAAACCAAGGAACAAGTTAGACAAGCCTTTATCAATTCTGGTGCATGGCAGAT  
TGGTCTTGCTAATTTTTGTGGGAATTA  
>HERV-K50A\_5220\_5320  
CTTGGATTCTACCTAAAATTACCAGACGTGAACCTTTAGAAAATGCTCTAACAGTATTTA  
CTGATGGTTCCAGCAATGGAAAAGCAGCTTACACAGGACC  
>HERV-K50A\_7111\_7271  
AGGAATCTCTACCCCAAGACCAAAAATAGTAAGTCCCTGTTTCTGGTCCTGAACATCCAGA  
ATTATGGAGGCTTACTGTGCCTCACACCACATTAGAATTTGGTCTGGAAATCAAACCTT  
AGAAACAAGAGATTGTAAGCCATTTTATACTATCGACCTA  
>HERV-K50A\_8296\_8462  
TAAGAAAAATCTTCTGCCTTGAGATTCTGTTAATCTATGACCTTACCCCAACCCCGTG  
CTCTCTGAAACGTGTGCTGTGTCAACTCAGGGTTGAATGGATTAAGGGCGGTGCAGGATG  
TGCTTTGTTAAACAGATGCTTGAAGGCAGCATGCTCCTTAAGAGTC  
>HERV-K50A\_8642\_8790  
GCTGAGGAGGATTAGTATAAGAGGAAGGAATGCCTCTTGCAGTTGAGACAAGAGGAAGGC  
ATCTGTCTCCTGCCTGTCCCTGGGCAATGGAATGTCTCGGTATAAAACCCGATTGTATGC  
TCCATCTACTGAGATAGGGAAAAACCGC  
>HERV-K50A\_8834\_9096  
AAAGCACTGAGATGTTTATGTGTATGCATATCCAAAAGCACAGCACTTAATCCTTTACAT  
TGTCTATGATGCCAAGACCTTTGTTTACGTGTTTGTCTGCTGACCCTCTCCCCACAATTG  
TCTTGTGACCCTGACACATCCCCCTCTTTGAGAAAACCCACAGATGATCAATAAAATACT  
AAGGGAACCTCAGAGGCTGGCGGGATCCTCCATATGCTGAACGCTGGTTCCCCGGGTCCCC  
TTATTTCTTTCTCTATACTTTG  
>HERV-K50B\_179\_300  
AATGGATTAAGGGCGGTGCAAGATGTGCTTTGTTAAACAGATGCTTGAAGGCAGCATGCT  
CCTTAAGAGTCATCACCCTCCCTAATCTCAAGTACCCAGGGACACAAAAACTGCGGAAG  
G  
>HERV-K50B\_3833\_4043  
ACTAGGGAAAAATGAAGATGGCATTAAAGTTCCAGTTGAGGCTAAAATAAATCAAGAAAAG  
AGAAGGAATAGGGTATCCTTTTTAGGGGCGGCCACTGTAGAGCCTCCTAAACCCATACCA  
TTAACTTGGAAAACAGAAAAACCGGTGTGGGTAAATCAGTGGCCGCTACCAAAAACAAAA  
CTGGAGGCTTTACATTTATTAGCAAATGAA  
>HERV-K50B\_8590\_8695  
GGGAAGGGAAAGACCTGACCGTCCCCAGCCCGACACCCGTAAAGGGTCTGTGCTGAGGA  
GGATTAGTATAAGAGGAAGGCATGCCTCTTGCAGTTGAGACAAGA  
>HERV-K50C\_2155\_2354  
GGACCTAACTCTCCTTATATGAGAACATTATTAGATTCCATTGCTCATGGAAATAGACTT  
ATTCCTTATAATTGGGAAAATTTGGCTAAATCTTCCCTTTCACCCTCTCAGTATCTACAG  
TTTAAAACCTGGTGGATTGATGGGGTACATGAACAGGTATGAAAAAATCAGGCTACTAAT



CCTGTTGCTTATATAGATG  
>HERV-K50C\_2683\_2876  
GGAGTTGATGTAATTACAGAAATATGTGAAGGCTTGTGATGGGATTGGAGGAGCTATGCGT  
AAGGCAATGTTATTGGCTCAAGCAATTACAGGGGTTGCTTTAGGAGGACAAGTTAAAAACA  
TTTGGGGAAAAATGTTATAATTGTGGTCAAATCGGACATCTAAAAAGAATTGCCTAGGC  
TTAAATAAACAGA  
>HERV-K50C\_3983\_4090  
GGCCACTGTAGAGCCTCCAAAACCCATTCCATCAACTTGAAAAACAGAAAAGCCTATAAAA  
GGTAAATCAGTGGCCACTACCAAAAACAAAAGCTGGAAGCCTTACACT  
>HERV-K50C\_7245\_7404  
TGGCTGATACTGCAGTGGTACTACAAAACAATAAATTCAGAATTATTATAGACTGGGCC  
CTCGAGGCCAATTATATTATGACTGTATGGGCCAGACCCACTCATGTTACAGGCTCCAT  
CTGTCTGGCCCACTAATCTGGCCTACGATGGTACTTAA  
>HERV-K50C\_7473\_7771  
TTCCATCACCCCGACCAAAGTTAGTTAGTCCTGTTGTTGGTCCGAAACACCCAGAATTAT  
GAAAGCTCACTGTGGCCTCGTACCACATTAGAATTTGGTCTGGAAATCAAGTTATGGGAA  
CAAGAAATCATAAGCCATATTATACTATTAACCTAAATTCCAATCTGACAATTCCTTTGC  
AAAGTTGTGTA AAAACCCCTTATATGTTAGTTGTAGGAAACATAGCTATTAACCAGATT  
CCCAAACATAAGCTGTGAAAATTGTAGATTGTTTACTTGCATTGATTCAACTTTTGA  
>HERV-K50C\_7814\_8352  
TGGATCCCTGTGTCCATGGGTGACGGTGGGAGGCTTCTCCATCCGTACATATCTTAAACA  
GAAGTAGTAAAAGGAGTTCTAACTAGATCTAAAAGATTCATTTTTACTCTGATTGCAGTG  
ATTATGGGTCTTATTGCAGTCACAGCTACTGCTGCGGCTGCTGGAATTGCTTTTACACTCC  
TCTGTTCAAACCTGCAGAATATGTGAATAATTGGCAAAGAATTCCTCAAATTTGTGGAAT  
TCTCAGACTCAAATAGATCAAAAATTGGCAAATCAAATTAATGATCTTAGACAAACTGTT  
ATTTGGATAAGAGATAGGCTCATGAGCTTGGAAATATCTTTTTTTCAGTTACAGTGTGACTGG  
AATACGTCAGATTTTTGTATTAGACCTCGAGCCTATAATGAATCTGAACATCACTGGGAC  
ATGGTTAGATGCCATCTACAAGGAAGAGAAGATAATCTTACCTTAGATATTTCTAAATTG  
AAAGAACAATTTTTGAAAACATCAAAGCCAGTTAAATCTGGTGCCAGAAACTGAGG  
>HERV-K50C\_8484\_8882  
GTATATCCAGCAGCTCCGGAGAGACAGCGACCAGCGAGAAATGGGCCATGATGACGATGGC  
GGTTTTGTCAAAAAGAAAAGGGGAAATGCAGGGAAAAGAAAGAGAGATCAGACTGTCCAC  
AGTGTCTATGTAGAAAAGGAAGACATAAGAGTCTCCATTTTTGAAAAGACGTGTACTTTA  
ACAATTGCTTTGCTTAGATATTGTTAATTTGTAGCCTTGCCCCAGCCACTTTGCTCCAG  
CCACTTTGACCCAACTTGAAACTCACAAAACATGTGTTGTATAAAATCAAGGTTTAAAGG  
GATCTAGGGCTGTGCAGGAAGTGCCTTGTTAACAAAATGTTTACAAGCAGTATACTTGGT  
AAAAGTCATCGCCATTCTCTAGTCTCAACAAACCAAGG  
>HERV-K50C\_8934\_9069  
TTGTCCAAGGTTTTCTCCCATGTGATAGTCTGAAATATGGCCTCATGGGATGAGAAAAGAC  
CTGACTGTCCCCAGCCGATACCTTAAAGGGTCTGTGCTGAGGTGGATTAGTAAAAGAG  
GAAAGCCTCTTGCAG  
>HERV-K50C\_9245\_9345  
TGGAGAGAAGCATGAATCTGGCCTACATGCACGTCCAGGCATAGTACCTTCCCTTGAAC  
TAATTATGATATAGATTCTTTTGCTCACATATTTCTTGT  
>HERV-K50C\_9406\_9506  
ATCATAATCAATAAAAACCTGAGGGAACCTCAGAGGCCGGTGCCAGTGCACGTCTTTATGT  
GCTGAGTGTCTGTCCCTGGAACCACTGTTGTTTCTCTAT  
>HERV-K50D\_5421\_5630  
TATGTAGTACAGGCTACAAGGGATGTTGAGACAGCTCTAATTAATATAGCATGGATGAT  
CAGTTAAACCAGCTATTC AATTTATTACAACAAACTGTAAGAAAAAGAAATTTCCCATTT  
TATATTACTCATATTCGAGCACACACTAATTTACCAGGGCCTTTGACTAAAGCAAATGAA  
CAAGCTGACTTACTGGTATCATCTGCATT  
>HERV-K50E\_4738\_4838  
CTGATCTTGTGGAGTGGTCATTCCTCCTCACAGTACAATTAAGACTTTTACATTGTACT

TGGATCAAATAGCTACATTAATTGGTCAGGAAAGATTACA  
>HERV-K51\_168\_300  
CTCAGGGTTAAATGGATTAAGGGCTGTGCAAGATGTGCTTTGTTAAACAGATGCTTGAAG  
GCAGCATGCTCCTTAAGAGTCATCACCCTCCCTAATCTCAAGTACCCAGGGACACAAAC  
ACTGCAGAAGGC  
>HERV-K5\_6259\_6553  
GGGAAATGTGGGGAAAAGAAAGAGATCAGATTGTTACTGTGTCTGTGTAGAAAGAAGTAG  
ACATAGGAGACTCCATTTTGTCTGTACTAAGAAAAATCTTCTGCCTTGAGATGCTGTT  
AATCTGTAACCTTACCCCAACCCTGTGCTCTCTGAAACACATGCTGTGTCAACTCAGGG  
TTAAATGGATTAAGGGCGGTGCAAGATGTGCTTTGTTAAACATGCTTGAAGGCAGCATGC  
TCCTTAGGAGTCATCACCCTCCCTAATCTCAAGTACCCAGGGACACAAAACAC  
>HERV-K5\_6605\_6723  
TTCTCCCCATGTGATAGTCTGAAATATGGCCTCGTGGGAAGGGAAAGACCTGACCGTCCC  
CCAGCCCACACCCATAAAGGTCTGTGCTGAGGAGGATTAGTATAAGAGGAAGGAAT  
>HERV-K5\_6854\_6954  
GTGGGACATGCAGGCAGCAATACTGCTCTGTAAGGCATTGAGATGTTTATGTGTATGCAT  
ATCTAAAGCACAGCACTTAATCTTTACCTTGTCTATGAT  
>HERV-K59\_3609\_3709  
TCAAATAGCTACATTAATTGGTCAGGCAAGGTTATGAATAATAAAATTGTGTGGAAGTGA  
CCCAGACAAAATCATTGTTCCTTTAAACAAGGAACAGGTT  
>HERV-K59\_4043\_4143  
TACAGGCTACAAGGGATGTTGAGACAGCCCTAATCAAATATAGTATTGATGATCAGTTAA  
ACCAGCTGTTCAACTTATTACAACAACTGTGAGAAAAAG  
>HERV-K59\_4226\_4326  
TACTGGTATCATCTGCATTCATAAAAGCACAAAGAACTTCATGCTTTGACTCATGTAAATG  
CAGCAGGATTAATAAATAAATTTGATATCTCATGGAAACAG  
>HERV-K59\_6200\_6662  
AAAGGGGGGAAAGGGTGGGGAAAAGATTGAGAAATCGGATGGTTGCGGTGTCTGTGTAGAA  
AGAGGTAGACATGGGAGACTTTTCATTTTGTCTGTACTAAGAAAAATTATTCTGCCTTG  
GGATCCTGTTGATCTGTGACCTTACCCCAACCCTGTGCTCTCTGAAACATGTGCTGCGT  
CCACTCATGGTTAAATGGATTAAGGGTGGTGAAGATGTGCTTTGTTAAACAGATGCTTG  
AAGGCAGCATGCTCGTTAAGAATCATCACCCTCCCTAATCTCAAGTACCCAGGGACACA  
AACACTGCGGAAGGCCGCTGCCTAGGAGAACCAGAGACCTTTGTTCACTTGTATTCTGC  
TGACCTTCCCTCCACTATTGTCTATGACCCTGCCAAATCCCCCTCTGTGAGAAACACCC  
AGAATGATCAATAAAAAATTAATAAAAAAAAAACAAAAAAAAA  
>HERV-K59\_9056\_9248  
TGTCTCCTGCACGTCCCTGGGATTGGATGTCTCAGCATAAAACCGACCATATATTCTATT  
CTGAGACAGGAGAAAACACCTTATGGCTGGAGGTGAGACATCATGGCGGCAATACTGCT  
CTGTTACTCTTTACTGCACTGAGTTGTTTATGTAAGCTTAAACATAAATCTAGCGATTGT  
GCACATCCAGGC  
>HERV-K60\_166\_309  
CAACTCAGAGTTGAATGGATTAAGGGCGGTGCAAGATGTGCTTTGTTAAACAGATGCTTG  
AAGGCAGCATGCTCCTTAAGAGTCATCACCCTCCCTAATCTCAAGTGCCCAGGGACACA  
AACACTGCGGAAGGCCGAGGGA  
>HERV-K60\_608\_708  
CAATACTGCTTTGTAAAGCATTGAGATGTTTATGTGTATGCATATCTAAAAGCACAGCAC  
TTAATCCTTTACATTGTCTATGATGCAAAGACCTTTGTTC  
>HERV-K60\_8873\_8973  
TTAAGGGCAGTGCAAGATGTGCTTTGTTAAACAGATGCTTGAAGGCAGCATGCTCCTTAA  
GAGTCATCACCCTCCCTAATCTCAAGTGCCCAGGGACA  
>HERV-K60\_9032\_9181  
TTCTCCCCATGTGATAGTCTGAAATATGGCCTCGTGGGAAGGGAAAGACCTGACCGTCCC  
CCAGCCCACACCCGTAAAGGGTCTGTGCTGAGGAGGATTAGTAAAAGAGGAAGGAATGC  
CTCTTGACAGTTGAGACAAGAGGAAGGCAT

>HERV-K60\_9356\_9456  
CTTAATCCTTTACATTGTCTATGATGCAAAGACCTTTGTTACGTGTTTGTCTGCTGACC  
CTCTCCCCACAATTGTCTTGTGACCCTGACACATCCCCCT  
>HERV-K68\_56\_214  
ACATAGGAGACTCCATTTTGTATGTACTAAGAAAAATTTCTTCTGCCTTGAGATTCTGTG  
ACCTTACCCCCAACCCCGTGCTCTCTGAAACATGTGCTGTGTCAACTCAGAGTTAAATGG  
ATTAAGGGCGGTGCAAGATGTGCTTTGTTAAACAGATG  
>HERV-K68\_8950\_9050  
TGACCTTACCCCCAACCCCGTGCTCTCTGAAACATGTGCTGTGTCAACTCAGAGTTAAAT  
GGATTAAGGGCGGTGCAAGATGTGCTTTGTTAAACAGATG  
>HERV-K68\_9423\_9598  
GACCTGCGGGCAGCAATACTGCTTTGTAAAGCATTGAGATGTTTATGTGTATGCATATCT  
AAAAGCACAGCACTTAATCCTTTACATTGTCTATGATGCAAAGACCTTTGTTACGTGTT  
TGTCTGCTGACCCTCTCCCCACAATTGTCTTGTGACCCTGACACATCCCCCTCTT  
>HERV-K71\_1116\_1263  
AAGAATTAACAAGCAAGTAGGGAAGGTAAAATCATCCCACCTTACAGCATGGAATGATT  
GGGCTATTATTAAGCAACTTGAGAACTATTTCAAATAGAAGAAGATAGCATTTTCAGTTT  
CTGATGCCCTGAAAGCTGTGTAATAG  
>HERV-K7\_1283\_1448  
ACAATTCGCCCATGGTTTCCAGAACAGGGAACCTTTAGATTTAGAAGATTGGGTAAAAAT  
TGGCAAAGAATAAAACAAGCAATTAGGAAGGTAAAATCATCCCACCTTACAGTATGGAAT  
GATTGGGCCATTATTAAGCAACTTTAGAACCATTTCAAATAGAA  
>HERV-K71\_2985\_3191  
GCAAGGTTGCAAGATGCAGCTCAAAAATCGATTGCAGATGATAACGCCCAAAAAGTTGTT  
GTAGAAATAATGGGTTATCAAAAATGCAAATCCAGGATGTCAATTGGCCATAAAGCCATTA  
AGAGGAAAGGTTTCAGCAGGAGTTGATGTAATTACAGAATATGTGAAGGCTTGTGATGG  
ATTGGAGGAACATGCATAAGGCAAT  
>HERV-K71\_3251\_3351  
AAAATGTTATAATTGTGGTCAAATCGGTCATCTAAAAAAGAATTGCCAGTCTTAAATAA  
ACAGAACAAAATAAACAGCCACCTGGCCTGTGTCCAAAA  
>HERV-K71\_368\_530  
AACCGCCTATGGTGGGAGGCGAGACATGTTTGCAGCAATGCTGCCTTGTTATTCTTTAC  
TCCACTGAGATGTTTGGGTGGAGAGAAACATAAATCTGGCTTACATGCACGTCCAGTCAT  
AGTACCTTCCCTTGAACCTAATTATGACGTAGATTCTATTCC  
>HERV-K71\_3699\_3840  
GCCTTATTTTAGGAAGATCAAGTCTAAATTTAAAGGGAGTCCAAATTCATACTGGGGTAA  
TTGATTAGATTATAAAGGGGAAATTCAGTTAGTGATCAGCTCTGCTGTTCCCTGGAGTG  
CCAATCCAGGTGATAGAATTG  
>HERV-K71\_4473\_4573  
CTGTATGGGTAAATCAGTGGCCACTACCAAAGCAAAAACCTGGAGGCCTTACACTTAGTGG  
CAAAGGAACAATTAGAAAAGGAAACATTGAGCCTTCATT  
>HERV-K71\_6145\_6276  
CTTGAAAGCAGGGTATTGTCCAAGGTTTCTCCCCATGTGATAGTCTGAAATATGGCCTCC  
TGGGATGAGAAAGACCTGACTGTCCCCAGCCGACACCATAAAGGGTCTGTGCTGCGG  
TGGGTTAGTAA  
>HERV-K71\_6385\_6649  
AGATGAGAGAAAAACCGCCCTATGGTGGGAGGCGAGACATGTTTGCAGCAATGCTGCCTC  
GTTATTCTTTACTCCACCGAGATGTTTGGGTGGAGAGAAACATAAATCTGGCTTACGTGC  
ATGTCCAGTCATAGTACCTTCCCTTGAACCTGAATTATTAGATTCTATTGCTCACGTTTGT  
TGCTGACCTTCTCCTTATTATCACCCCTGCCCTCCTACTACATTCCTTTTTACTGAAATAA  
TGACGATAATAATCAATAAAAACT  
>HERV-K71\_88\_209  
ACTGTGAAAAGCTACAGGGACCTCTGCCCTTGAAAGCGGGGTATTGTCCAAGGTTTCTCC  
CCATGTGATAGTCTGAAATATGGCCTCATGGGATGAGAAAGACCTGACCGTCCCCCAGCC

T

>HERV-K7\_34\_150

GTGTCTATGTAGAAAGGGAAGACATAAGAGACTCCATTTTAAAAAGATCTGTACTTTAA  
ACAATTGCGTTGCTGAGATGTTGTTTCAATTTGTAGCTTTGCCCCAGCCACTTTGCC

>HERV-K7\_6717\_7076

TTAATGATTGTATCAACGGTGGTAAGTCTCCCTATGTCTTCAGGAGCTGCTACAGCTAAC  
TATACTTACTGAGCCTATGTGATTTTCCCACCCTTAATTCGGGCAGTCACTTGGATAGAT  
AATCCTATTGAAGTATATGTTAATAACAGTGCAAGGGTACCAGGCCCCACTGATGACCGT  
GGCCCTGCCAACCTGAAGAAGAAGGAATGATGATAAACATTTCCCTTTGGGTGTCATTAT  
CCTCCTATTTGCTGGGAAAAGCACCAGGATGCTTAATGCCTACAATCCAAAATTGGTTG  
ATAGAAGTACCTACTGTCAGTGCCACCAGTAAATTTACTTATCATAACGATAAGTGGAAT

>HERV-K7\_7138\_7334

GGCCTAAAGGGAAACCATGCCCAAGGAAATTCAAAAGAATCAAAGACCCAGAAGTCT  
TAGTTTGGGAAGAATGTGTGGCTGATACTGCAGTGGTACTACAAAACAATAAATTTGGAA  
CTATTATAGACTAGGCCCTTGAGGCCAATTATATTATGACTGTATGGGCCAGACCCACT  
CATGTTTACAGGCTCC

>HERV-K77\_150\_250

CTGGAGCTCAGAAAACATGTGTTGTATGAAATCAAGGTTTAAGGGATCTAGGGCTGTGC  
AGGACATGCCTTGTTAACAATAATGTTTACAAGCAGTATAC

>HERV-K7\_7416\_7516

ATCCATGGAAATGGGGTGAAAAGAGGATTTTCATCACCCGACCAAAGTTAGTTAGTCCTG  
TTGTTGGTCTGAACACCCAGAATTATGGAAGCTCACTGT

>HERV-K77\_502\_602

GTCTCCTGCTTGCCCTGGGAACTGAATGTCTCAGTGTAAAACCCGATTGTACATTTGTT  
CAACTCTGAGATAGGAGAAAAGCTGCCCTGTGGCAGGAGG

>HERV-K77\_6411\_6511

TTGTTTGTGTTTACCAGGAGAAAATCAGCTTCCCTGTTGGGTACCCACTAGACATTTGA  
AGTTCTACAATGAACCCATCAGAGATGCAAGGGAAGGCAC

>HERV-K7\_7656\_8078

TAGGAAACATAGCTATTAACCAGATTCCTAACTACAACCAGTAAAATTGTAGATTGT  
TTACTTGCATTGATTCAACTTTTGGATTGGCAGAATGGTACTCTGTAAGAGCAAGAGAAGG  
CGTGTGGATCCCTGTGTCCATGGATCGACCGTGGGAGGCTTCTCCATCCGTACATATCTT  
AAGTATTAAGGAGTTCTAACTAGATCTAAAAGATTCATTTTACTTTGATTGCAGTGA  
TTATGGGCCTTATTGCAGTCAAGCTACTGCTGCGCCTGCTGGAATTGCTTTACACTCCT  
CTGTTCAAAGTGCAGAAATATGTGAATAATTGGCAAAAAGAAATTCCTCAAATTTGTGGAATT  
CTTAGACTCAAATAGATCAAAAATTGACAAATCAAATTAATGATCTTAGACAAACTGTTA  
TT

>HERV-K77\_8882\_8982

TGTGAAAGCCACAGGGACCTCTGCCCTTGAGAGCAGGGTATTGTCCAAGGTTTCTCCCC  
ATGTGATAGTCTGAAATATGGCCTCATGGGATGAGAAAAGA

>HERV-K77\_9131\_9230

ACATTTGTTCAACTCTGAGATAGGAGAAAAGCTGCCCTGTGGTGGGAGGCGAGACATGTT  
TGCAGTAATGCTGCCTTGTATTCTTTACTCCACTGAGA

>HERV-K77\_9327\_9427

TATTTCTTGTGATCTTCTCCTTATTATCACCTGCTCTCCTACTACATTTCTTTTTGCT  
GAAATAATGAAATCATAATCAATAAAAAGTGGGAACT

>HERV-K7\_8488\_8588

CATGATGACGATGGCGGTTTGTCAAAAAGAAAAGGGGAAATGTAGGAAAAGCGAGAG  
ATCAGACTGTCAGTGTCTATGTAGAAAAGGGAAGACATA

>HERV-K7\_8691\_8791

CAACTTGGAGTTCAGAAAACATGTGTTGTATAAAATCAAGGTTTAAGGGATCTAGGGCT  
GTGCAGGACGTGCCTTGTTAACCATAATGTTTACAAGCAGT
